# Supplementary material for: Multimodal fusion learning for long QT syndrome pathogenic genotypes in a racially diverse population
Source: PubMed Central journal article supplement — NPJ Digit Med. 2024 Aug 24;7:226. doi: 10.1038/s41746-024-01218-1 (PMC11344778; doi:10.1038/s41746-024-01218-1), 2024-08-24
Supplement: 41746_2024_1218_MOESM1_ESM.pdf [file 41746_2024_1218_MOESM1_ESM.pdf]

**Supplementary Table 1.** Genetic variants associated with patients from Mount Sinai BioMe Biobank.

| ID | Chromosome | Position  | Reference Allele | Alternative Allele |
|----|------------|-----------|------------------|--------------------|
| 1  | 7          | 150948435 | CCGCCTCA         | C                  |
| 2  | 7          | 150948435 | CCGCCTCA         | C                  |
| 3  | 7          | 150947708 | G                | C                  |
|    | 11         | 2768881   | C                | T                  |
| 4  | 7          | 150958305 | CT               | C                  |
| 5  | 11         | 2588798   | A                | AC                 |
| 6  | 11         | 2572979   | G                | A                  |
| 7  | 7          | 150947431 | C                | CGGGGGGGGGGGGG     |
| 8  | 7          | 150947431 | C                | CGGGGGGGGGGGGG     |
|    | 11         | 2778022   | C                | G                  |
|    | 11         | 38604907  | G                | C                  |
| 9  | 11         | 2588855   | G                | A                  |
| 10 | 7          | 150948435 | CCGCCTCA         | C                  |
| 11 | 7          | 150947431 | C                | CGGGGGGGGGGGGG     |
| 12 | 7          | 150948435 | CCGCCTCA         | C                  |
| 13 | 11         | 2776984   | A                | G                  |
| 14 | 7          | 150948445 | C                | CG                 |
|    | 7          | 150948446 | T                | TGTCCG             |
| 15 | 7          | 150948445 | C                | CG                 |
|    | 7          | 150948446 | T                | TGTCCG             |
| 16 | 7          | 150948435 | CCGCCTCA         | C                  |

**Supplementary Table 2.** Genetic variants associated with patients from the United Kingdom Biobank.

| ID | Chromosome | Position  | Reference Allele | Alternative Allele |
|----|------------|-----------|------------------|--------------------|
| 1  | 6          | 7579527   | C                | T_T                |
| 2  | 6          | 7579527   | C                | T_T                |
| 3  | 7          | 150947376 | C                | CG_CG              |
| 4  | 7          | 150948995 | G                | A_A                |
| 5  | 7          | 150950246 | C                | A_A                |
| 6  | 7          | 150948938 | T                | C_C                |
| 7  | 7          | 150951649 | G                | A_A                |
| 8  | 7          | 150958430 | G                | T_T                |
| 9  | 7          | 150948938 | T                | C_C                |
| 10 | 11         | 2583486   | G                | A_A                |
| 11 | 11         | 2776033   | G                | A_A                |
| 12 | 11         | 2570719   | G                | A_A                |
| 13 | 11         | 2768917   | C                | T_T                |
| 14 | 11         | 2570637   | CT               | C_C                |
| 15 | 11         | 2778003   | C                | T_T                |
| 16 | 11         | 2528019   | G                | A_A                |
| 17 | 11         | 2776006   | C                | T_T                |
| 18 | 11         | 2661960   | G                | T_T                |
| 19 | 11         | 2445251   | C                | G_G                |
| 20 | 11         | 2661960   | G                | T_T                |
| 21 | 11         | 2583535   | C                | A_A                |
| 22 | 11         | 2768917   | C                | T_T                |
| 23 | 11         | 2572862   | T                | C_C                |
| 24 | 11         | 2572021   | G                | A_A                |
| 25 | 11         | 2583535   | C                | A_A                |
| 26 | 11         | 2776032   | C                | T_T                |
| 27 | 11         | 2768917   | C                | T_T                |

|    |    |          |   |     |
|----|----|----------|---|-----|
| 28 | 11 | 2776997  | C | T_T |
| 29 | 11 | 2776033  | G | A_A |
| 30 | 11 | 2661960  | G | T_T |
| 31 | 11 | 2572870  | G | A_A |
| 32 | 11 | 2768917  | C | T_T |
| 33 | 11 | 2572970  | C | T_T |
| 34 | 11 | 2570670  | C | T_T |
| 35 | 11 | 2570685  | G | A_A |
| 36 | 11 | 2570719  | G | A_A |
| 37 | 11 | 2583478  | C | T_T |
| 38 | 11 | 2661960  | G | T_T |
| 39 | 11 | 2571391  | C | T_T |
| 40 | 11 | 2661960  | G | T_T |
| 41 | 11 | 2778023  | C | T_T |
| 42 | 11 | 2776033  | G | A_A |
| 43 | 11 | 2572870  | G | A_A |
| 44 | 11 | 2776033  | G | A_A |
| 45 | 11 | 2583544  | C | T_T |
| 46 | 11 | 2570685  | G | A_A |
| 47 | 11 | 2776997  | C | T_T |
| 48 | 11 | 2768917  | C | T_T |
| 49 | 11 | 2572862  | T | C_C |
| 50 | 11 | 2570652  | G | A_A |
| 51 | 11 | 2572970  | C | T_T |
| 52 | 11 | 2661960  | G | T_T |
| 53 | 11 | 2572882  | C | T_T |
| 54 | 11 | 2768917  | C | T_T |
| 55 | 21 | 34370656 | T | C_C |
